# Supplementary material for: Identification of a Novel Saxitoxin Analogue, 12β-Deoxygonyautoxin 3, in the Cyanobacterium, Anabaena circinalis (TA04)
Source: PubMed Central journal article supplement (PMC6784053; doi:10.3390/toxins11090539), 2019-09-16
Supplement: toxins-11-00539-s001.pdf [file toxins-11-00539-s001.pdf]

## Supplementary Materials: Identification of a Novel Saxitoxin Analogue, 12 $\beta$ -Deoxygonyautoxin 3, in the Cyanobacterium, *Anabaena circinalis* (TA04)

Takashi Minowa, Yuko Cho, Yasukatsu Oshima, Keiichi Konoki and Mari Yotsu-Yamashita

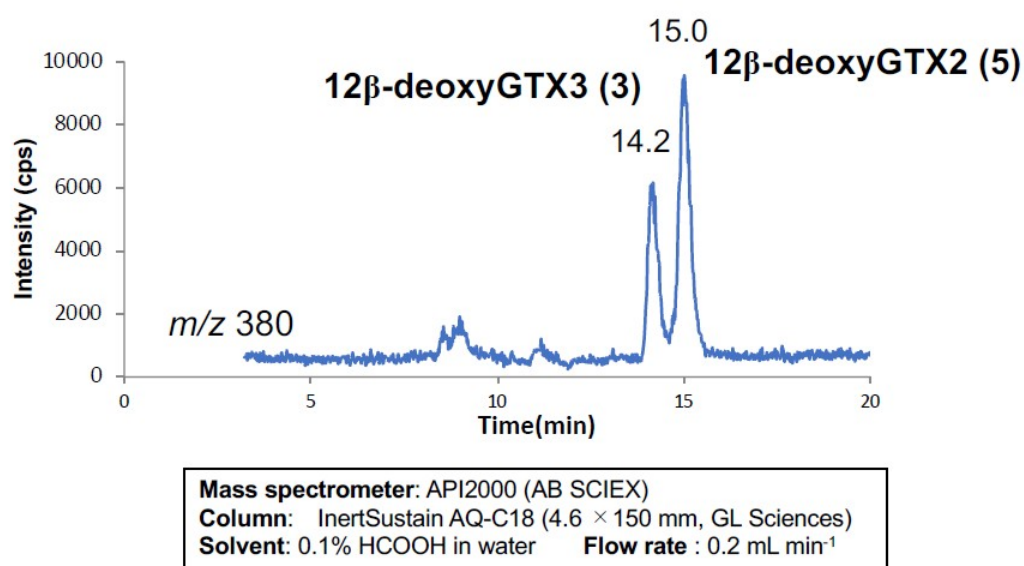

Figure S1. Separation of 3 and 5 using reverse-phase chromatography.

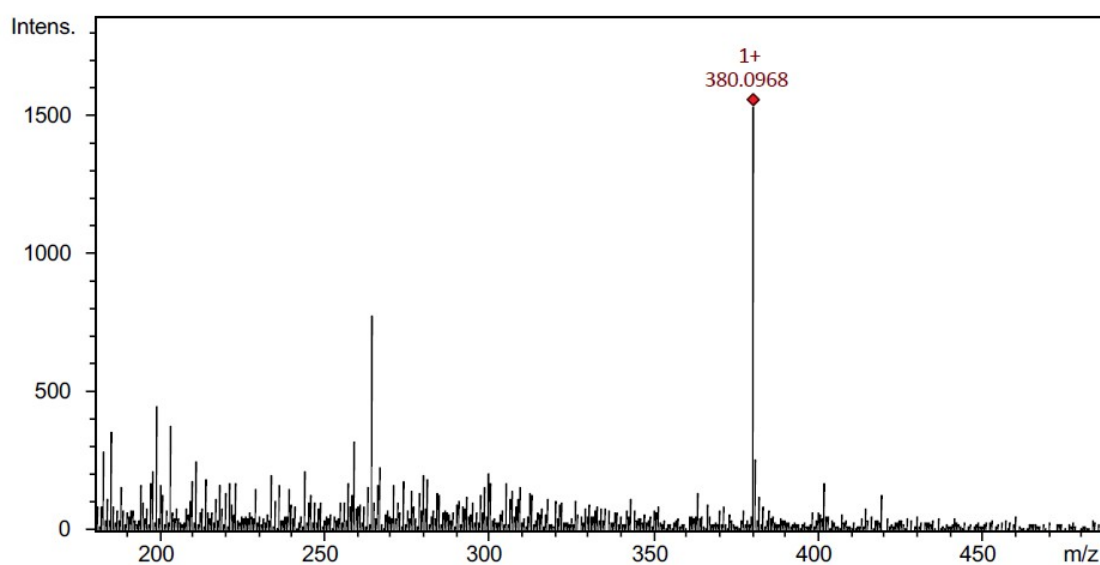

Figure S2. ESI-HRMS spectrum of synthetic 12 $\beta$ -deoxyGTX3 (3) ([M+H]<sup>+</sup>,  $m/z$  380.0968 C<sub>10</sub>H<sub>18</sub>N<sub>7</sub>O<sub>7</sub>S,  $\Delta$  3.9 ppm).

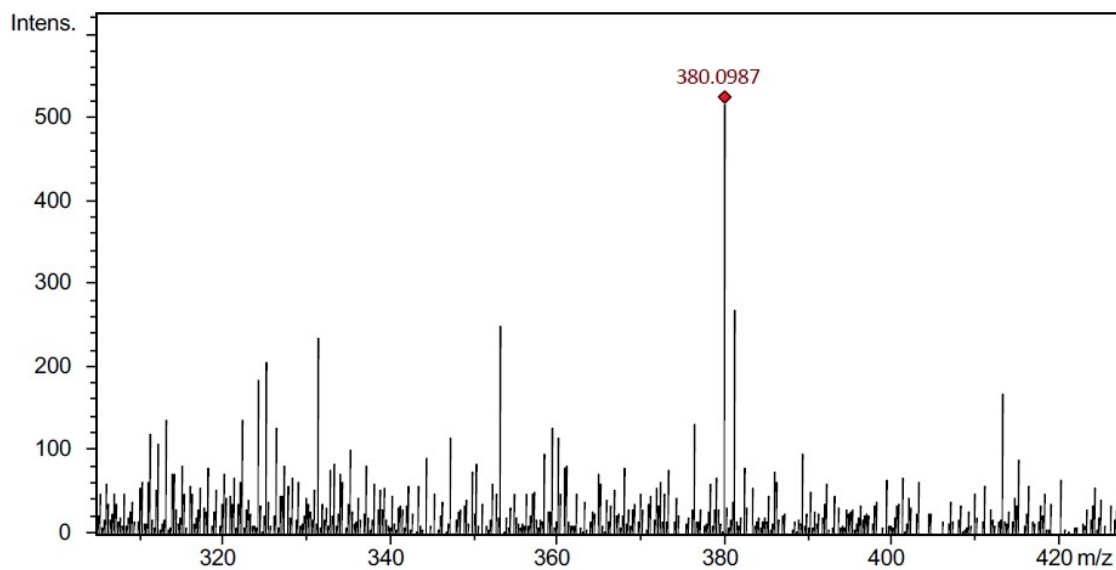

**Figure S3.** ESI-HRMS spectrum of synthetic 12 $\beta$ -deoxyGTX2 (5). ( $[M+H]^+$ ,  $m/z$  380.0987  $C_{10}H_{18}N_7O_7S$ ,  $\Delta$  1.1 ppm)

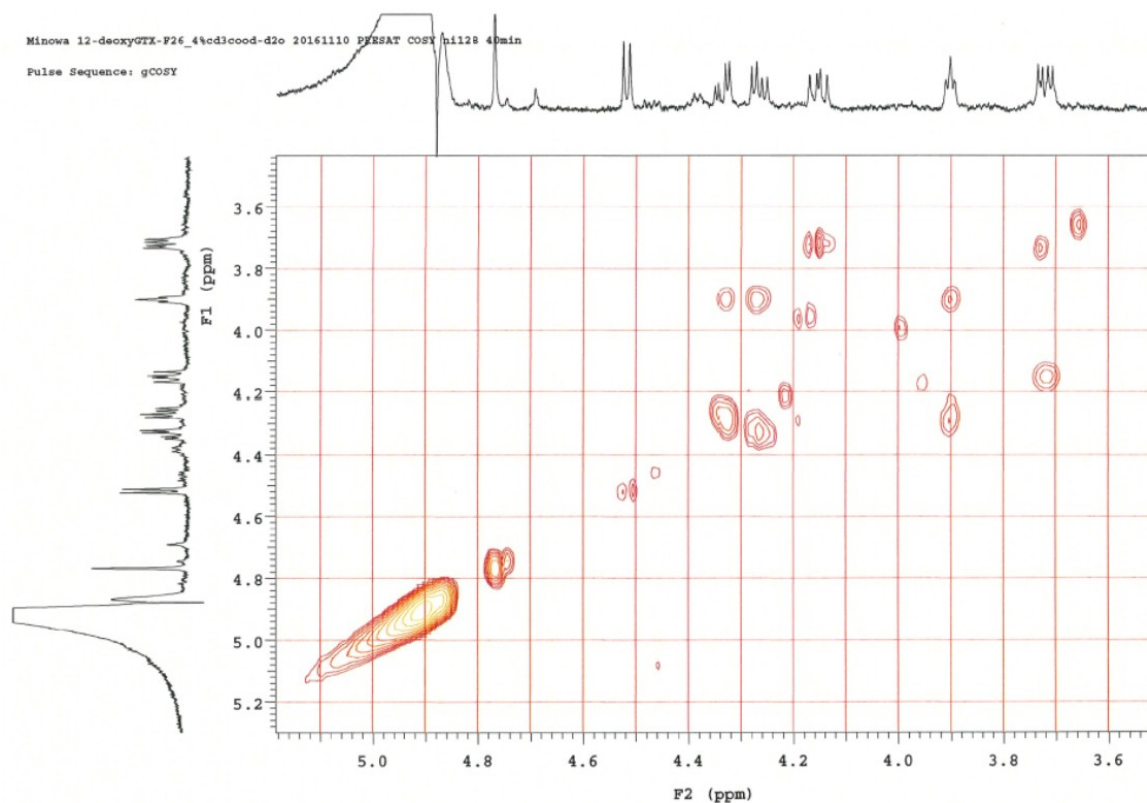

**Figure S4.** COSY spectrum of synthetic 12 $\beta$ -deoxyGTX3 (3), 600 MHz,  $CD_3COOD-D_2O$  (4:96,  $v/v$ ).

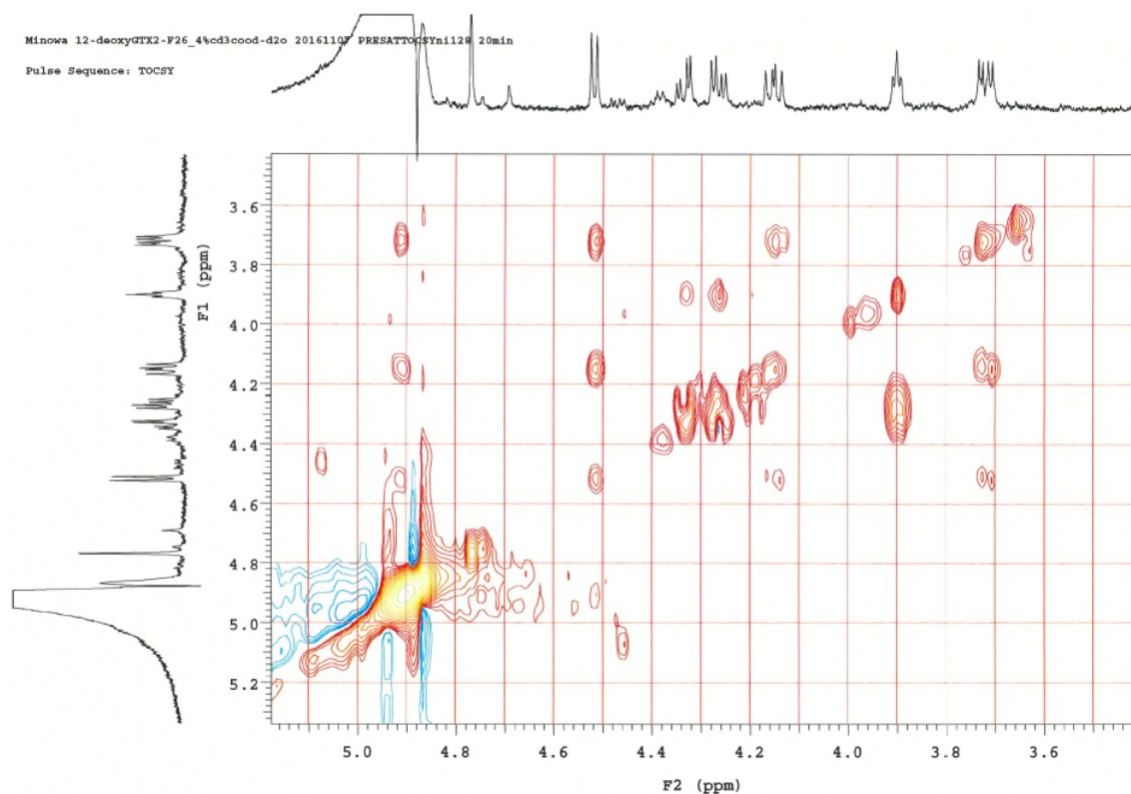

Figure S5. TOCSY spectrum of synthetic 12β-deoxyGTX3 (3), 600 MHz, CD<sub>3</sub>COOD-D<sub>2</sub>O (4:96, v/v)

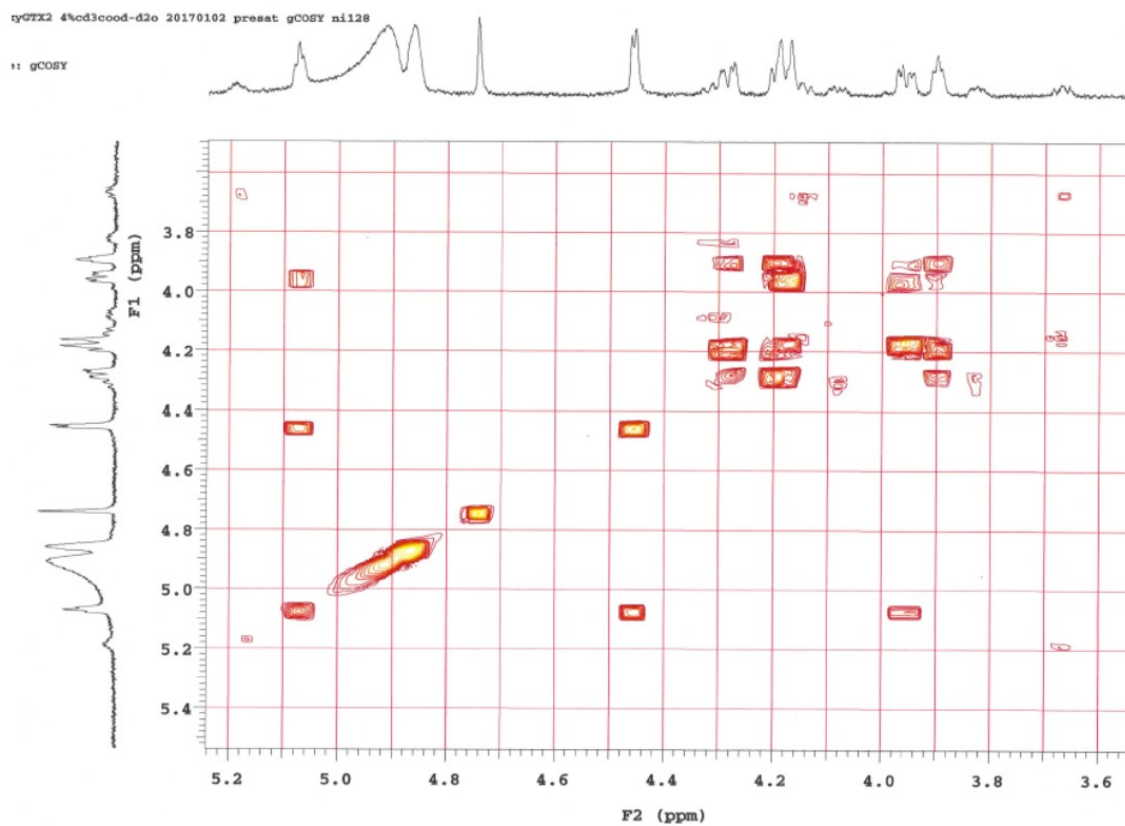

Figure S6. COSY spectrum of synthetic 12β-deoxyGTX2 (5), 600 MHz, CD<sub>3</sub>COOD-D<sub>2</sub>O (4:96, v/v).

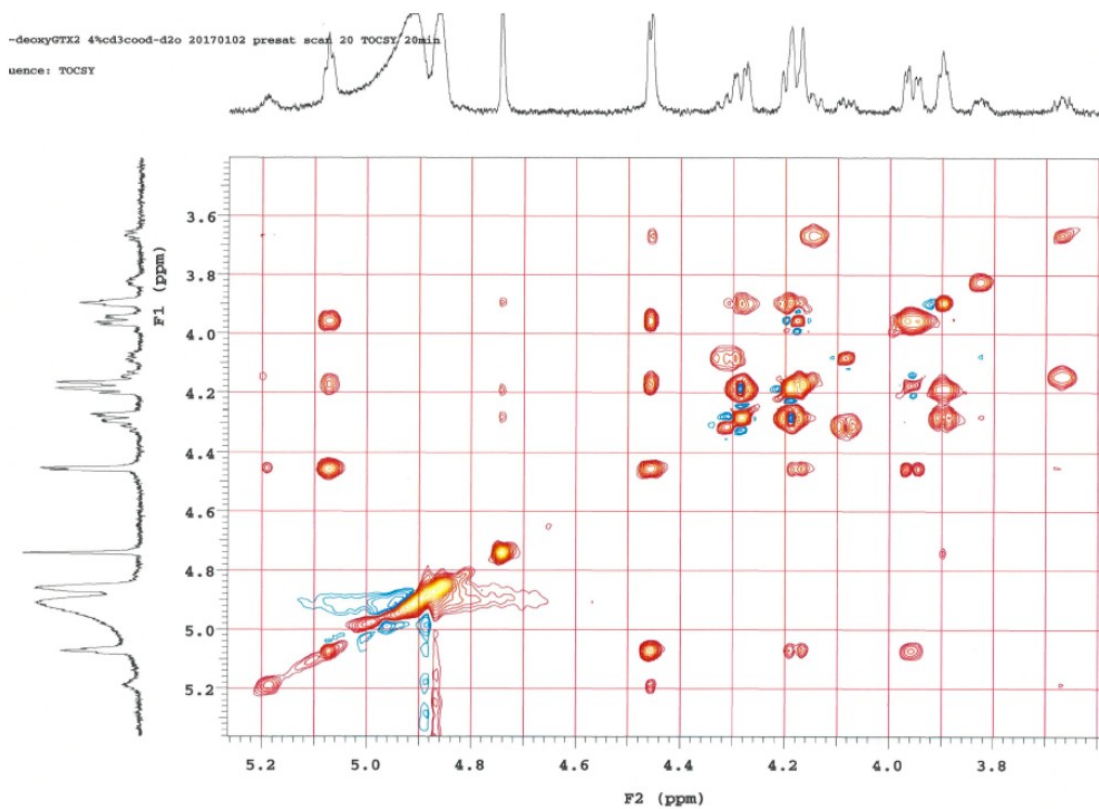

Figure S7. TOCSY spectrum of synthetic 12β-deoxyGTX2 (5), 600 MHz, CD<sub>3</sub>COOD-D<sub>2</sub>O (4:96, v/v).
